# Supplementary material for: Trends in the Binding of Cell Penetrating Peptides to siRNA: A Molecular Docking Study
Source: PubMed Central journal article supplement (PMC5340175; doi:10.1155/2017/1059216), 2017-02-21
Supplement: 1059216.f1.pdf [file 1059216.f1.pdf]

**Supporting information for**  
**Trends in the binding of cell penetrating peptides to**  
**siRNA: A molecular docking study**

P. V. G. M. Rathnayake<sup>a</sup>, B. G. C. M. Gunathunge<sup>b</sup>, P.N. Wimalasiri<sup>b</sup>, D. N. Karunaratne<sup>a,b</sup>,  
R. J. K. U. Ranatunga<sup>a,b\*</sup>

<sup>a</sup>Postgraduate Institute of Science, University of Peradeniya, Peradeniya 20400, Sri Lanka

<sup>b</sup>Department of Chemistry, University of Peradeniya, Peradeniya 20400, Sri Lanka

\*Corresponding author: [udyranatunga@pdn.ac.lk](mailto:udyranatunga@pdn.ac.lk)

Supplementary data includes amino acid sequence and secondary structure of Cell Penetrating Peptides (CPPs) with their charge. Further, binding energies with siRNA, dimerization energy and SASA are included.

## Basic information and Binding Energy Scores: Cationic Cell Penetrating Peptides with GAPDH (A-form and B-form) and HPV16E6

|                           | Penetratin                                                                        |              |                | HIV-TAT (47–57)                                                                    |              | R10                                                                                 |              | CCMV Gag                                                                            |              | Chimeric dermataseptin S4 and SV40 'S413-PV'                                        |              |
|---------------------------|-----------------------------------------------------------------------------------|--------------|----------------|------------------------------------------------------------------------------------|--------------|-------------------------------------------------------------------------------------|--------------|-------------------------------------------------------------------------------------|--------------|-------------------------------------------------------------------------------------|--------------|
|                           | 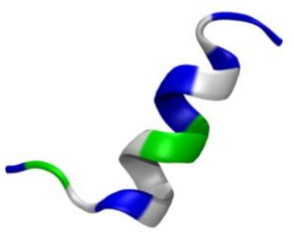 |              |                |  |              |  |              |  |              |  |              |
| Amino Acid Sequence       | RQIKIWFQNRRMKWKK                                                                  |              |                | YGRKKRRQRRR                                                                        |              | RRRRRRRRRR                                                                          |              | KLTRAQRRRAARKNKRN TRGC                                                              |              | ALWKTLLKKVLKAPKKKR KVC                                                              |              |
| Charge                    | +7.00                                                                             |              |                | +8.00                                                                              |              | +10.00                                                                              |              | +9.00                                                                               |              | +9.00                                                                               |              |
| Residue count             | 16                                                                                |              |                | 11                                                                                 |              | 10                                                                                  |              | 21                                                                                  |              | 21                                                                                  |              |
| SASA                      | 21.81 nm <sup>2</sup>                                                             |              |                | 17.92 nm <sup>2</sup>                                                              |              | 20.95 nm <sup>2</sup>                                                               |              | 24.72 nm <sup>2</sup>                                                               |              | 24.59 nm <sup>2</sup>                                                               |              |
| Dimerization energy Score | -642.1                                                                            |              |                | -175.9                                                                             |              | -138.5                                                                              |              | -189.0                                                                              |              | -174.7                                                                              |              |
| CPP count on complex      | Binding Energy Score                                                              |              |                | Binding Energy Score                                                               |              | Binding Energy Score                                                                |              | Binding Energy Score                                                                |              | Binding Energy Score                                                                |              |
|                           | GAPDH B-form                                                                      | GAPDH A-form | HPV16E6 A-form | GAPDH B-form                                                                       | GAPDH A-form | GAPDH B-form                                                                        | GAPDH A-form | GAPDH B-form                                                                        | GAPDH A-form | GAPDH B-form                                                                        | GAPDH A-form |
| 1                         | -1532.6                                                                           | -1628.7      | -1745.80       | -1285.3                                                                            | -1581.4      | -1572.8                                                                             | -1858.70     | -1651.2                                                                             | -1865.60     | -1295.2                                                                             | -1421.70     |
| 2                         | -1439.6                                                                           | -1535.6      | -1559.10       | -1285.3                                                                            | -1380.0      | -1480.3                                                                             | -1661.30     | -1602.4                                                                             | -1311.30     | -1186.0                                                                             | -1205.60     |
| 3                         | -1182.1                                                                           | -1332.8      | -1288.20       | -1050.6                                                                            | -1334.9      | -1375.1                                                                             | -1364.20     | -1153.5                                                                             | -1283.10     | -986.6                                                                              | -1187.10     |
| 4                         | -1038.8                                                                           | -1120.4      | -1031.10       | -978.0                                                                             | -941.7       | -1165.3                                                                             | -1128.10     | -1126.3                                                                             | -1047.40     | -922.3                                                                              | -882.80      |
| 5                         | -988.5                                                                            | -1007.2      | -1067.60       | -821.3                                                                             | -868.7       | -956.3                                                                              | -1175.30     | -993.7                                                                              | -986.10      | -798.1                                                                              | -823.10      |
| 6                         | -985.1                                                                            | -1004.8      | -1094.10       | -804.4                                                                             | -928.6       | -847.5                                                                              | -934.90      | -788.4                                                                              | -968.20      | -633.9                                                                              | -828.10      |
| 7                         | -844.8                                                                            | -1164.9      | -970.10        | -626.3                                                                             | -875.6       | -726.0                                                                              | -846.90      | -677.6                                                                              | -894.50      | -636.2                                                                              | -831.90      |
| 8                         | -842.0                                                                            | -1065.7      | -1203.00       | -592.8                                                                             | -824.4       | -658.4                                                                              | -798.40      | -672.3                                                                              | -825.80      | -582.0                                                                              | -716.70      |
| 9                         | -869.1                                                                            | -928.6       | -915.90        | -571.6                                                                             | -704.5       | -553.7                                                                              | -733.30      | -578.3                                                                              | -843.90      | -452.3                                                                              | -627.90      |
| 10                        | -814.5                                                                            | -983.1       | -1073.90       | -525.2                                                                             | -766.2       | -444.0                                                                              | -625.90      | -552.7                                                                              | -728.60      | -399.1                                                                              | -618.70      |

|          |                 |                 |                  |                 |                 |                 |                  |                 |                  |                 |                  |
|----------|-----------------|-----------------|------------------|-----------------|-----------------|-----------------|------------------|-----------------|------------------|-----------------|------------------|
| 11       | -734.0          | -958.9          | -1004.20         | -486.3          | -704.2          | -386.8          | -620.50          | -531.0          | -662.90          | -314.2          | -553.20          |
| 12       | -722.4          | -1253.8         | -945.50          | -450.8          | -583.2          | -354.0          | -602.00          | -487.2          | -601.40          | -299.1          | -423.20          |
| 13       | -695.1          | -864.4          | -909.10          | -366.1          | -553.8          | -315.2          | -560.30          | -379.1          | -480.00          | -299.1          | -396.70          |
| 14       | -597.1          | -934.2          | -875.70          | -351.4          | -467.5          | -308.5          | -455.30          | -399.8          | -465.30          | -273.4          | -442.00          |
| 15       | -632.0          | -841.6          | -819.00          | -288.2          | -514.7          | -223.3          | -334.50          | -321.0          | -456.90          | -231.8          | -356.80          |
| 16       | -631.1          | -812.7          | -754.10          | -298.8          | -518.7          | -211.6          | -259.40          | -291.5          | -384.90          | -226.1          | -260.80          |
| 17       | -562.8          | -700.6          | -728.50          | -249.5          | -364.3          | -172.8          | -260.90          | -348.6          | -361.80          | -227.5          | -282.20          |
| 18       | -553.8          | -737.5          | -698.10          | -225.8          | -381.6          | -171.6          | -190.40          | -243.5          | -361.00          | -308.9          | -269.10          |
| 19       | -592.1          | -682.7          | -619.40          | -213.8          | -394.5          | -181.4          | -144.80          | -302.3          | -358.40          | -220.6          | -274.60          |
| 20       | -514.6          | -725.3          | -626.00          | -213.1          | -362.7          | -130.5          | -85.10           | -217.9          | -283.20          | -193.2          | -285.20          |
| 21       | -524.3          | -600.9          | -634.20          | -187.1          | -290.6          | -100.5          | -178.30          | -207.1          | -276.70          | -162.3          | -216.20          |
| 22       | -630.9          | -591.7          | -576.70          | -208.4          | -352.4          | -81.0           | -39.20           | -218.3          | -390.60          | -161.4          | -200.30          |
| 23       | -535.4          | -605.8          | -580.70          | -220.8          | -273.5          | -69.3           | -143.40          | -276.9          | -229.20          | -163.2          | -222.90          |
| 24       | -535.8          | -621.4          | -569.20          | -111.5          | -243.2          | -56.8           | -101.30          | -197.7          | -254.90          | -163.8          | -223.70          |
| 25       | -557.9          | -662.4          | -591.50          | -109.6          | -268.1          | -53.8           | -63.30           | -194.5          | -218.90          | -143.7          | -228.60          |
| 26       | -474.4          | -574.5          | -592.30          | -93.2           | -312.3          | -44.9           | -61.10           | -197.8          | -241.30          | -139.0          | -204.10          |
| 27       | -488.3          | -622.7          | -547.70          | -114.3          | -296.7          | -85.0           | -87.00           | -190.7          | -308.20          | -170.0          | -190.40          |
| 28       | -565.6          | -598.2          | -548.40          | -181.2          | -196.3          | -49.5           | -110.70          | -318.2          | -235.20          | -162.1          | -231.90          |
| 29       | -480.1          | -541.2          | -550.10          | -106.3          | -221.0          | -38.0           | -153.50          | -255.6          | -295.70          | -142.6          | -187.30          |
| 30       | -490.5          | -528.5          | -557.90          | -151.3          | -186.9          | -52.3           | -124.50          | -181.9          | -216.60          | -130.7          | -171.90          |
| <b>Σ</b> | <b>-22054.9</b> | <b>-26230.8</b> | <b>-25677.10</b> | <b>-13185.3</b> | <b>-17692.2</b> | <b>-12866.2</b> | <b>-15702.50</b> | <b>-15557.0</b> | <b>-17837.60</b> | <b>-12024.4</b> | <b>-14764.70</b> |

## Basic information and Binding Energy Scores: Hydrophobic Cell Penetrating Peptides with GAPDH (A-form and B-form) and HPV16E6

|                           | <b>K-FGF<br/>Kaposi sarcoma<br/>fibroblast growth<br/>factor</b>                  | <b>Integrin <math>\beta</math>3-fragment</b>                                      | <b>Hepatitis B virus<br/>translocation motif</b>                                   | <b>Grb2 (SH2 Domain)</b>                                                            | <b>Fusion sequence HIV-1<br/>gp41(1-23)</b>                                         | <b>C105Y</b>                                                                        |                      |              |                      |              |                |                      |              |
|---------------------------|-----------------------------------------------------------------------------------|-----------------------------------------------------------------------------------|------------------------------------------------------------------------------------|-------------------------------------------------------------------------------------|-------------------------------------------------------------------------------------|-------------------------------------------------------------------------------------|----------------------|--------------|----------------------|--------------|----------------|----------------------|--------------|
|                           | 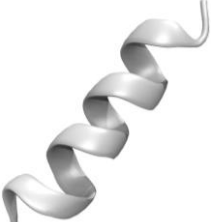 |  |  |  |  |  |                      |              |                      |              |                |                      |              |
| Amino Acid Sequence       | AAVALLPAVLLALLAP                                                                  | VTVLGALAGVGVG                                                                     | PLSSIFSRIGDP                                                                       | AAVLLPVLLAAP                                                                        | GALFLGFLGAAGSTMGA                                                                   | CSIPPEVKFNKPFVYLI                                                                   |                      |              |                      |              |                |                      |              |
| Charge                    | +1.27e-7                                                                          | +8.94e-8                                                                          | +7.08e-8                                                                           | +9.69e-8                                                                            | +1.23e-7                                                                            | +1.00                                                                               |                      |              |                      |              |                |                      |              |
| Residue count             | 16                                                                                | 14                                                                                | 12                                                                                 | 12                                                                                  | 17                                                                                  | 17                                                                                  |                      |              |                      |              |                |                      |              |
| SASA                      | 18.19 nm <sup>2</sup>                                                             | 13.21 nm <sup>2</sup>                                                             | 13.36 nm <sup>2</sup>                                                              | 12.02 nm <sup>2</sup>                                                               | 16.31 nm <sup>2</sup>                                                               | 18.19 nm <sup>2</sup>                                                               |                      |              |                      |              |                |                      |              |
| Dimerization Energy Score | -360.5                                                                            | -376.6                                                                            | -282.0                                                                             | -292.4                                                                              | -517.7                                                                              | -513.7                                                                              |                      |              |                      |              |                |                      |              |
| CPP count on complex      | Binding Energy Score                                                              |                                                                                   | Binding Energy Score                                                               |                                                                                     | Binding Energy Score                                                                |                                                                                     | Binding Energy Score |              | Binding Energy Score |              |                | Binding Energy Score |              |
|                           | GAPDH B-form                                                                      | GAPDH A-form                                                                      | GAPDH B-form                                                                       | GAPDH A-form                                                                        | GAPDH B-form                                                                        | GAPDH A-form                                                                        | GAPDH B-form         | GAPDH A-form | GAPDH B-form         | GAPDH A-form | HPV16E6 A-form | GAPDH B-form         | GAPDH A-form |
| 1                         | -800.2                                                                            | -952.10                                                                           | -866.9                                                                             | -816.90                                                                             | -714.8                                                                              | -864.00                                                                             | -636.2               | -712.70      | -1225.3              | -1613.80     | -1180.40       | -956.8               | -1396.60     |
| 2                         | -716.9                                                                            | -965.20                                                                           | -813.6                                                                             | -856.30                                                                             | -712.2                                                                              | -903.60                                                                             | -666.4               | -768.70      | -1203.1              | -1124.30     | -1189.40       | -1025.9              | -1191.90     |
| 3                         | -816.5                                                                            | -784.40                                                                           | -805.1                                                                             | -823.50                                                                             | -706.0                                                                              | -775.70                                                                             | -675.5               | -749.50      | -1204.8              | -1074.10     | -937.40        | -947.5               | -952.20      |
| 4                         | -741.1                                                                            | -709.70                                                                           | -809.9                                                                             | -702.10                                                                             | -725.1                                                                              | -854.50                                                                             | -651.8               | -759.90      | -1182.0              | -898.00      | -914.50        | -995.7               | -897.50      |
| 5                         | -727.1                                                                            | -714.10                                                                           | -796.4                                                                             | -677.30                                                                             | -704.2                                                                              | -796.30                                                                             | -603.4               | -703.30      | -994.1               | -924.90      | -925.80        | -909.1               | -772.90      |
| 6                         | -717.9                                                                            | -626.80                                                                           | -741.4                                                                             | -712.80                                                                             | -709.5                                                                              | -740.60                                                                             | -635.0               | -617.30      | -943.2               | -990.50      | -975.80        | -817.2               | -859.70      |
| 7                         | -652.3                                                                            | -756.30                                                                           | -699.9                                                                             | -663.90                                                                             | -764.1                                                                              | -802.10                                                                             | -612.0               | -578.40      | -996.9               | -996.60      | -954.60        | -867.0               | -951.90      |

|          |                 |                  |                 |                  |                 |                  |                 |                  |                 |                  |                  |                 |                  |
|----------|-----------------|------------------|-----------------|------------------|-----------------|------------------|-----------------|------------------|-----------------|------------------|------------------|-----------------|------------------|
| 8        | -719.2          | -753.70          | -679.3          | -750.30          | -663.6          | -731.00          | -548.0          | -605.80          | -982.4          | -990.80          | -972.20          | -749.1          | -848.30          |
| 9        | -711.0          | -783.80          | -641.5          | -708.10          | -634.4          | -723.40          | -645.1          | -645.20          | -921.1          | -930.80          | -989.70          | -733.1          | -935.90          |
| 10       | -686.5          | -729.00          | -631.0          | -735.60          | -701.3          | -752.20          | -547.9          | -618.40          | -980.5          | -924.90          | -935.90          | -878.4          | -802.00          |
| 11       | -674.8          | -683.40          | -651.8          | -702.20          | -588.4          | -805.80          | -570.7          | -623.20          | -950.9          | -911.50          | -970.90          | -797.6          | -877.20          |
| 12       | -655.7          | -738.70          | -627.8          | -759.50          | -593.0          | -809.70          | -536.0          | -648.90          | -942.4          | -952.70          | -950.00          | -693.7          | -808.60          |
| 13       | -696.3          | -807.10          | -702.0          | -856.00          | -567.1          | -784.90          | -551.2          | -696.30          | -888.8          | -900.20          | -994.90          | -734.3          | -799.40          |
| 14       | -768.3          | -730.20          | -610.2          | -784.40          | -544.4          | -706.70          | -563.5          | -655.40          | -863.5          | -877.20          | -1064.60         | -750.1          | -827.50          |
| 15       | -803.8          | -700.10          | -672.2          | -748.60          | -613.4          | -695.40          | -575.0          | -601.20          | -934.5          | -901.90          | -916.10          | -656.7          | -878.60          |
| 16       | -717.8          | -733.30          | -749.7          | -726.60          | -558.7          | -712.20          | -556.9          | -648.50          | -926.9          | -952.30          | -942.40          | -723.8          | -813.10          |
| 17       | -668.8          | -722.20          | -610.8          | -738.90          | -553.8          | -696.00          | -588.5          | -615.30          | -938.6          | -938.50          | -906.70          | -745.2          | -827.70          |
| 18       | -854.1          | -763.20          | -652.6          | -688.40          | -558.4          | -713.70          | -564.0          | -614.60          | -840.0          | -892.10          | -952.20          | -752.6          | -805.20          |
| 19       | -787.4          | -814.70          | -650.9          | -692.50          | -654.0          | -711.60          | -608.6          | -658.10          | -811.8          | -868.50          | -930.60          | -754.5          | -830.20          |
| 20       | -722.9          | -769.30          | -597.2          | -771.50          | -543.2          | -703.00          | -580.6          | -683.90          | -865.0          | -927.80          | -951.00          | -657.2          | -780.20          |
| 21       | -689.5          | -750.00          | -606.0          | -720.10          | -590.0          | -628.70          | -566.0          | -657.80          | -804.4          | -907.70          | -999.80          | -680.2          | -774.80          |
| 22       | -713.1          | -750.00          | -604.3          | -677.00          | -563.0          | -679.70          | -562.0          | -647.70          | -884.5          | -844.30          | -905.40          | -694.1          | -780.30          |
| 23       | -705.2          | -711.30          | -633.6          | -688.20          | -573.7          | -665.60          | -579.3          | -625.60          | -827.8          | -871.20          | -868.60          | -668.3          | -774.70          |
| 24       | -663.0          | -791.90          | -683.8          | -676.80          | -546.2          | -724.50          | -604.3          | -638.90          | -878.9          | -961.40          | -860.10          | -632.1          | -872.10          |
| 25       | -693.9          | -753.20          | -608.2          | -728.00          | -559.1          | -672.60          | -640.6          | -682.00          | -846.6          | -946.50          | -852.50          | -664.4          | -871.50          |
| 26       | -709.0          | -788.80          | -623.7          | -777.10          | -543.4          | -664.90          | -548.9          | -618.80          | -842.9          | -881.40          | -883.20          | -623.1          | -846.10          |
| 27       | -650.8          | -756.00          | -631.2          | -733.90          | -550.1          | -646.10          | -565.2          | -616.80          | -814.4          | -885.00          | -830.40          | -627.5          | -907.70          |
| 28       | -725.8          | -767.90          | -613.0          | -773.10          | -541.1          | -717.40          | -550.5          | -595.80          | -837.1          | -882.90          | -888.60          | -665.5          | -768.40          |
| 29       | -693.0          | -806.80          | -609.0          | -691.50          | -530.5          | -673.90          | -548.2          | -620.90          | -828.2          | -837.20          | -860.40          | -747.5          | -730.50          |
| 30       | -785.4          | -797.60          | -647.6          | -769.40          | -566.7          | -690.80          | -544.2          | -599.30          | -838.6          | -872.90          | -858.00          | -703.2          | -754.50          |
| <b>Σ</b> | <b>-21667.3</b> | <b>-22910.80</b> | <b>-20270.6</b> | <b>-22150.50</b> | <b>-18373.4</b> | <b>-22046.60</b> | <b>-17625.5</b> | <b>-19508.20</b> | <b>-27999.2</b> | <b>-28481.90</b> | <b>-28362.10</b> | <b>-22851.4</b> | <b>-25937.20</b> |

## Basic information and Binding Energy Scores: Amphipathic Cell Penetrating Peptides with GAPDH (A-form and B-form) and HPV16E6

|                           | Transportan                                                                       |              | pVEC<br>(Vascular endothelial cadherin)                                           |              | MPG                                                                                |              | CADY                                                                                |              |                | sC18                                                                                |              | C6                                                                                  |              |
|---------------------------|-----------------------------------------------------------------------------------|--------------|-----------------------------------------------------------------------------------|--------------|------------------------------------------------------------------------------------|--------------|-------------------------------------------------------------------------------------|--------------|----------------|-------------------------------------------------------------------------------------|--------------|-------------------------------------------------------------------------------------|--------------|
|                           | 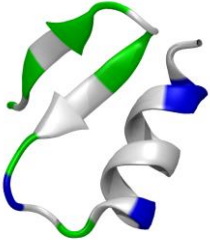 |              |  |              |  |              |  |              |                |  |              |  |              |
| Amino Acid Sequence       | GWTLNSAGYLLGKIN<br>LKALAALAKKIL                                                   |              | LLIILRRRIRKQAHAAH<br>SK                                                           |              | GALFLGFLGAAGST<br>MGAWSQPKKKRKV                                                    |              | GLWRALWRLLRSLWRLWRA                                                                 |              |                | GLRKRLRKFRNKIKE<br>K                                                                |              | RLLRLLLRLLWRLLRL<br>LR                                                              |              |
| Charge                    | +4.00                                                                             |              | +6.00                                                                             |              | +5.00                                                                              |              | +5.00                                                                               |              |                | +8.00                                                                               |              | +7.00                                                                               |              |
| Residue count             | 27                                                                                |              | 18                                                                                |              | 27                                                                                 |              | 20                                                                                  |              |                | 16                                                                                  |              | 18                                                                                  |              |
| SASA                      | 27.44 nm <sup>2</sup>                                                             |              | 23.16 nm <sup>2</sup>                                                             |              | 26.88 nm <sup>2</sup>                                                              |              | 25.02 nm <sup>2</sup>                                                               |              |                | 23.03 nm <sup>2</sup>                                                               |              | 25.19 nm <sup>2</sup>                                                               |              |
| Dimerization Energy Score | -529.7                                                                            |              | -281.4                                                                            |              | -564.2                                                                             |              | -848.3                                                                              |              |                | -286.3                                                                              |              | -588.1                                                                              |              |
| CPP count on complex      | Binding Energy Score                                                              |              | Binding Energy Score                                                              |              | Binding Energy Score                                                               |              | Binding Energy Score                                                                |              |                | Binding Energy Score                                                                |              | Binding Energy Score                                                                |              |
|                           | GAPDH B-form                                                                      | GAPDH A-form | GAPDH B-form                                                                      | GAPDH A-form | GAPDH B-form                                                                       | GAPDH A-form | GAPDH B-form                                                                        | GAPDH A-form | HPV16E6 A-form | GAPDH B-form                                                                        | GAPDH A-form | GAPDH B-form                                                                        | GAPDH A-form |
| 1                         | -1169.9                                                                           | -1068.80     | -1529.5                                                                           | -1533.60     | -1694.2                                                                            | -1625.20     | -1453.4                                                                             | -1437.90     | -1399.70       | -1398.4                                                                             | -1675.90     | -1367.4                                                                             | -1460.70     |
| 2                         | -1067.5                                                                           | -1158.90     | -1356.3                                                                           | -1363.70     | -1301.4                                                                            | -1486.50     | -1456.4                                                                             | -1474.50     | -1331.10       | -1299.3                                                                             | -1263.80     | -1248.5                                                                             | -1340.20     |
| 3                         | -1055.4                                                                           | -1154.60     | -1125.2                                                                           | -1078.20     | -1340.1                                                                            | -1114.40     | -1358.8                                                                             | -1215.50     | -1466.10       | -991.5                                                                              | -1185.20     | -1136.5                                                                             | -1239.20     |
| 4                         | -1039.8                                                                           | -992.20      | -1100.4                                                                           | -990.20      | -1184.8                                                                            | -1070.50     | -1402.5                                                                             | -1182.60     | -1346.90       | -948.0                                                                              | -862.50      | -1030.0                                                                             | -1007.20     |
| 5                         | -910.0                                                                            | -975.60      | -1183.8                                                                           | -1015.10     | -1082.0                                                                            | -1105.10     | -1391.0                                                                             | -1232.30     | -1333.10       | -864.1                                                                              | -900.10      | -979.8                                                                              | -1124.10     |
| 6                         | -977.6                                                                            | -864.60      | -895.7                                                                            | -980.30      | -1027.1                                                                            | -1093.70     | -1244.0                                                                             | -1364.20     | -1249.80       | -733.9                                                                              | -863.90      | -924.8                                                                              | -1056.80     |
| 7                         | -803.4                                                                            | -866.50      | -854.3                                                                            | -900.30      | -946.3                                                                             | -1014.90     | -1245.8                                                                             | -1237.30     | -1205.20       | -724.2                                                                              | -824.50      | -919.1                                                                              | -1035.40     |
| 8                         | -876.8                                                                            | -841.70      | -785.3                                                                            | -842.50      | -874.7                                                                             | -1035.40     | -1283.3                                                                             | -1239.00     | -1158.50       | -589.1                                                                              | -735.00      | -899.6                                                                              | -1066.30     |

|          |                 |                  |                 |                  |                 |                  |                 |                  |                  |                 |                  |                 |                  |
|----------|-----------------|------------------|-----------------|------------------|-----------------|------------------|-----------------|------------------|------------------|-----------------|------------------|-----------------|------------------|
| 9        | -759.8          | -807.30          | -721.3          | -795.40          | -983.5          | -1046.90         | -1308.2         | -1230.00         | -1157.00         | -513.4          | -677.80          | -987.1          | -931.50          |
| 10       | -762.0          | -789.60          | -681.3          | -931.00          | -829.1          | -913.00          | -1274.3         | -1215.60         | -1130.50         | -500.0          | -669.20          | -888.8          | -924.90          |
| 11       | -736.8          | -775.20          | -643.2          | -766.70          | -822.7          | -876.40          | -1214.2         | -1152.00         | -1369.00         | -451.2          | -627.00          | -847.6          | -1054.20         |
| 12       | -696.1          | -747.70          | -684.3          | -710.20          | -856.0          | -894.20          | -1185.2         | -1250.60         | -1146.40         | -526.0          | -558.70          | -778.5          | -994.80          |
| 13       | -715.6          | -780.50          | -544.3          | -692.70          | -802.0          | -851.30          | -1415.4         | -1246.10         | -1198.00         | -401.1          | -592.70          | -796.1          | -871.70          |
| 14       | -690.5          | -793.10          | -527.1          | -703.50          | -742.9          | -765.90          | -1221.1         | -1220.60         | -1260.70         | -370.7          | -590.60          | -807.3          | -943.20          |
| 15       | -698.2          | -778.10          | -547.1          | -696.10          | -751.2          | -734.40          | -1329.9         | -1260.00         | -1274.20         | -334.6          | -550.90          | -767.4          | -941.00          |
| 16       | -683.4          | -781.50          | -524.7          | -656.70          | -798.7          | -756.20          | -1240.5         | -1211.90         | -1132.40         | -318.0          | -464.10          | -755.6          | -912.20          |
| 17       | -712.6          | -725.40          | -546.6          | -631.30          | -727.0          | -779.70          | -1107.2         | -1208.50         | -1316.70         | -293.8          | -442.70          | -857.3          | -897.60          |
| 18       | -660.0          | -714.60          | -579.5          | -594.80          | -743.2          | -760.10          | -1182.1         | -1143.90         | -1294.40         | -312.0          | -306.70          | -816.7          | -890.80          |
| 19       | -648.9          | -718.30          | -501.1          | -607.50          | -824.9          | -742.40          | -1197.8         | -1231.60         | -1197.10         | -300.3          | -368.90          | -816.3          | -892.40          |
| 20       | -666.5          | -736.50          | -494.8          | -585.10          | -717.0          | -798.70          | -1092.0         | -1348.60         | -1237.10         | -400.6          | -327.60          | -753.5          | -868.30          |
| 21       | -734.2          | -753.00          | -504.3          | -556.20          | -774.1          | -836.10          | -1277.6         | -1155.10         | -1152.90         | -293.0          | -352.80          | -832.8          | -805.40          |
| 22       | -636.6          | -898.20          | -541.8          | -558.00          | -679.0          | -746.10          | -1299.7         | -1112.00         | -1176.60         | -233.0          | -239.60          | -946.4          | -844.20          |
| 23       | -676.1          | -735.90          | -553.5          | -542.30          | -702.7          | -767.10          | -1232.1         | -1175.90         | -1239.00         | -260.8          | -318.50          | -720.8          | -842.80          |
| 24       | -622.0          | -766.20          | -553.0          | -512.10          | -856.3          | -701.10          | -1093.2         | -1215.00         | -1182.20         | -201.6          | -244.40          | -707.0          | -820.40          |
| 25       | -621.1          | -709.70          | -526.7          | -556.70          | -727.2          | -683.90          | -1092.8         | -1167.70         | -1204.60         | -204.3          | -228.40          | -903.6          | -889.40          |
| 26       | -604.7          | -681.60          | -487.1          | -523.40          | -724.8          | -740.90          | -1086.8         | -1280.70         | -1124.70         | -222.9          | -185.80          | -789.5          | -847.20          |
| 27       | -619.0          | -649.80          | -463.3          | -523.90          | -651.5          | -676.10          | -1108.0         | -1128.60         | -1208.50         | -184.2          | -182.10          | -816.0          | -824.20          |
| 28       | -638.9          | -763.80          | -491.8          | -526.40          | -756.7          | -741.40          | -1229.9         | -1054.80         | -1212.50         | -182.3          | -175.00          | -719.1          | -885.20          |
| 29       | -592.5          | -670.40          | -511.9          | -553.60          | -630.3          | -735.70          | -1097.9         | -1235.90         | -1149.80         | -181.0          | -176.10          | -832.2          | -823.00          |
| 30       | -664.4          | -668.50          | -505.3          | -519.40          | -717.8          | -712.90          | -1172.5         | -1087.90         | -1135.00         | -169.3          | -118.80          | -705.1          | -831.30          |
| $\Sigma$ | <b>-22740.3</b> | <b>-24367.80</b> | <b>-20964.5</b> | <b>-22446.90</b> | <b>-26269.2</b> | <b>-26806.20</b> | <b>-37293.6</b> | <b>-36716.30</b> | <b>-36989.70</b> | <b>-14402.6</b> | <b>-16709.30</b> | <b>-26350.4</b> | <b>-28865.60</b> |

### Solvent Accessible Surface Area (SASA) – GAPDH (B-form)

| CPP<br>count<br>on<br>complex | Solvent Accessible Surface Area (SASA)<br>nm <sup>2</sup> |                    |        |             |        |                                       |             |             |        |               |        |                                       |        |        |        |        |        |
|-------------------------------|-----------------------------------------------------------|--------------------|--------|-------------|--------|---------------------------------------|-------------|-------------|--------|---------------|--------|---------------------------------------|--------|--------|--------|--------|--------|
|                               | Cationic Cell Penetrating Peptides                        |                    |        |             |        | Hydrophobic Cell Penetrating Peptides |             |             |        |               |        | Amphipathic Cell Penetrating Peptides |        |        |        |        |        |
|                               | Penetratin                                                | HIV-TAT<br>(47–57) | R10    | CCMV<br>Gag | SV40   | K-FGF                                 | Integrin β3 | Hepatitis B | Grb2   | HIV-1<br>gp41 | C105Y  | Transportan                           | pVEC   | MPG    | CADY   | sC18   | C6     |
| 0                             | 80.67                                                     | 83.68              | 92.15  | 84.82       | 81.12  | 81.19                                 | 81.13       | 81.12       | 81.94  | 80.49         | 81.38  | 79.14                                 | 78.32  | 80.69  | 81.84  | 85.39  | 78.98  |
| 1                             | 102.36                                                    | 102.54             | 112.94 | 108.40      | 104.82 | 97.34                                 | 89.75       | 89.99       | 90.47  | 96.11         | 99.10  | 101.34                                | 100.35 | 106.85 | 106.11 | 108.06 | 105.08 |
| 2                             | 121.66                                                    | 122.33             | 131.84 | 133.37      | 126.93 | 113.72                                | 103.84      | 100.95      | 100.13 | 107.75        | 114.55 | 119.15                                | 122.41 | 133.42 | 131.98 | 130.49 | 123.35 |
| 3                             | 137.67                                                    | 138.40             | 151.12 | 153.91      | 150.51 | 125.34                                | 115.63      | 112.71      | 109.73 | 121.99        | 122.54 | 140.35                                | 142.03 | 142.18 | 155.72 | 148.52 | 147.07 |
| 4                             | 158.00                                                    | 153.04             | 169.06 | 173.30      | 172.19 | 131.27                                | 126.12      | 119.52      | 116.05 | 133.86        | 131.01 | 153.55                                | 158.85 | 166.49 | 169.64 | 164.49 | 171.80 |
| 5                             | 177.23                                                    | 170.97             | 185.59 | 194.08      | 193.33 | 138.44                                | 137.21      | 125.99      | 124.52 | 143.05        | 141.90 | 167.73                                | 175.72 | 188.54 | 193.72 | 185.79 | 197.47 |
| 6                             | 190.93                                                    | 178.46             | 195.49 | 207.91      | 205.55 | 149.90                                | 139.12      | 129.23      | 127.40 | 150.25        | 148.37 | 185.37                                | 191.59 | 203.81 | 203.80 | 199.95 | 218.38 |
| 7                             | 211.72                                                    | 193.34             | 214.94 | 228.57      | 229.42 | 162.43                                | 148.28      | 136.67      | 138.03 | 159.40        | 156.99 | 197.78                                | 210.87 | 230.15 | 227.17 | 218.07 | 238.13 |
| 8                             | 211.03                                                    | 194.51             | 213.09 | 229.01      | 230.08 | 165.59                                | 148.62      | 138.01      | 139.80 | 158.93        | 162.54 | 204.67                                | 210.15 | 226.44 | 230.29 | 220.91 | 244.66 |
| 9                             | 224.56                                                    | 202.93             | 224.67 | 242.97      | 245.82 | 170.40                                | 153.01      | 142.19      | 138.20 | 168.68        | 167.29 | 214.74                                | 221.95 | 246.69 | 233.17 | 231.79 | 260.67 |
| 10                            | 239.99                                                    | 213.62             | 238.19 | 257.81      | 261.37 | 178.46                                | 157.03      | 147.11      | 143.33 | 176.09        | 179.64 | 235.79                                | 236.77 | 262.00 | 248.22 | 251.41 | 281.93 |
| 11                            | 253.45                                                    | 229.07             | 257.83 | 281.25      | 285.90 | 187.46                                | 160.33      | 157.33      | 152.57 | 185.73        | 196.40 | 256.04                                | 256.27 | 280.22 | 265.17 | 264.69 | 298.05 |
| 12                            | 272.75                                                    | 243.66             | 277.81 | 301.46      | 306.84 | 197.08                                | 172.14      | 162.00      | 155.43 | 199.16        | 206.49 | 261.06                                | 272.30 | 302.01 | 286.26 | 286.29 | 314.87 |
| 13                            | 272.18                                                    | 243.44             | 276.45 | 297.58      | 312.17 | 195.06                                | 176.64      | 162.40      | 157.38 | 199.69        | 211.20 | 283.43                                | 267.62 | 304.96 | 290.21 | 285.14 | 315.60 |
| 14                            | 287.21                                                    | 259.41             | 294.90 | 318.89      | 330.61 | 199.18                                | 180.59      | 164.78      | 165.61 | 202.68        | 227.24 | 302.17                                | 285.45 | 325.18 | 307.55 | 305.46 | 339.55 |
| 15                            | 301.70                                                    | 271.48             | 311.53 | 341.09      | 349.69 | 200.44                                | 180.20      | 169.23      | 161.46 | 211.52        | 236.26 | 306.61                                | 297.36 | 340.63 | 317.96 | 318.88 | 354.83 |
| 16                            | 308.97                                                    | 281.95             | 325.07 | 351.80      | 362.56 | 201.49                                | 187.20      | 173.58      | 165.32 | 214.33        | 231.11 | 314.88                                | 311.76 | 350.43 | 323.71 | 333.61 | 365.22 |
| 17                            | 322.36                                                    | 292.05             | 343.61 | 369.13      | 382.72 | 210.55                                | 189.04      | 176.43      | 169.47 | 219.45        | 235.36 | 322.55                                | 331.22 | 362.63 | 335.72 | 354.11 | 384.45 |
| 18                            | 331.49                                                    | 305.66             | 362.12 | 392.46      | 398.69 | 209.40                                | 187.51      | 178.94      | 171.20 | 225.77        | 239.66 | 324.65                                | 337.45 | 370.98 | 335.73 | 371.89 | 395.80 |



|    |        |        |        |        |        |        |        |        |        |        |        |        |        |        |        |        |        |
|----|--------|--------|--------|--------|--------|--------|--------|--------|--------|--------|--------|--------|--------|--------|--------|--------|--------|
| 19 | 352.59 | 319.47 | 378.90 | 413.18 | 416.33 | 212.85 | 189.11 | 184.33 | 179.30 | 231.21 | 250.25 | 333.02 | 355.73 | 387.34 | 345.90 | 389.61 | 407.78 |
| 20 | 353.89 | 318.79 | 380.58 | 414.56 | 420.11 | 205.43 | 183.51 | 184.88 | 180.72 | 227.15 | 250.81 | 339.21 | 352.53 | 377.90 | 345.75 | 390.55 | 400.07 |
| 21 | 363.38 | 331.63 | 391.98 | 434.77 | 435.61 | 210.52 | 190.71 | 191.69 | 185.10 | 234.13 | 251.50 | 338.98 | 366.25 | 387.25 | 359.28 | 400.40 | 407.27 |
| 22 | 364.19 | 327.06 | 394.30 | 439.58 | 442.78 | 214.36 | 185.64 | 185.09 | 183.25 | 230.03 | 250.53 | 355.02 | 359.28 | 384.09 | 344.78 | 401.82 | 400.85 |
| 23 | 369.55 | 332.71 | 397.39 | 441.52 | 449.09 | 218.86 | 179.57 | 183.86 | 181.64 | 222.53 | 254.44 | 360.81 | 360.13 | 384.07 | 33908  | 402.25 | 397.47 |
| 24 | 380.65 | 342.07 | 415.30 | 454.80 | 467.01 | 221.82 | 177.69 | 189.47 | 178.53 | 221.62 | 254.32 | 364.68 | 364.96 | 381.57 | 34042  | 415.82 | 396.72 |
| 25 | 382.15 | 348.26 | 423.87 | 462.14 | 474.80 | 219.19 | 176.10 | 188.52 | 176.55 | 214.64 | 252.69 | 373.88 | 377.08 | 372.71 | 330.72 | 416.38 | 395.58 |
| 26 | 397.18 | 363.61 | 441.88 | 484.45 | 496.47 | 223.08 | 178.21 | 189.75 | 179.68 | 218.86 | 260.05 | 381.34 | 390.12 | 384.95 | 338.52 | 427.66 | 404.82 |
| 27 | 396.18 | 371.46 | 446.88 | 498.79 | 505.32 | 223.43 | 179.78 | 185.48 | 177.83 | 214.32 | 250.56 | 380.81 | 388.98 | 379.92 | 341.36 | 431.49 | 405.92 |
| 28 | 406.17 | 383.38 | 462.05 | 514.38 | 520.35 | 218.77 | 182.39 | 183.51 | 182.12 | 214.72 | 248.69 | 391.43 | 392.85 | 385.70 | 342.44 | 448.78 | 416.11 |
| 29 | 418.83 | 394.66 | 477.29 | 533.90 | 536.81 | 219.04 | 182.64 | 182.88 | 178.65 | 212.89 | 254.68 | 384.91 | 404.82 | 387.91 | 339.34 | 465.07 | 429.21 |
| 30 | 428.12 | 402.60 | 491.40 | 546.42 | 553.72 | 222.62 | 185.81 | 185.39 | 182.53 | 214.75 | 261.54 | 395.58 | 412.29 | 392.68 | 350.92 | 472.82 | 432.68 |
